# Supplementary material
Source: publisher site journal article supplement (https://www.dovepress.com/article/388924)
Supplement: Supplementary file 1 [file get_supplementary_file.php]

**Supplementary 1 Appendix**

**How to use Pediatric Perioperative-Transfusion-Trigger Score for scoring**

**Table 1. Pediatric Perioperative-Transfusion-Trigger Score, Pediatric POTTS**

| Points added | Adrenaline infusion rate  (μg kg−1 min−1) | Minimum FiO2 to keep SpO2≧ 95% | Core body Temperature ******(°C) | Age | Maximum score |
| --- | --- | --- | --- | --- | --- |
| 0 | Not required | ＜35% | ＜38 ℃ | 7~14y | 10 |
| +1 | ≤0.05μg/kg.min | 36~50% | 38~40 ℃ | 1~7y | 11 |
| +2 | >0.05μg/kg.min | ≥51% | ＞40 ℃ | 1m~1y | 12 |
| +3 | _ | _ | _ | Newborn | 13 |

The final score is the sum of 6 basal points plus all added points.

**Adrenaline infusion rate:** Adrenaline infusion rate required to maintain an adequate cardiac output. **FiO2%:** Fraction of inspired oxygen, a clinical indicator for pulmonary function. **Core body temperature:** a clinical indicator of total body oxygen consumption. **Maximum score:** Every age group has a maximum score, the final score is no more than the maximum score.

(1) Pediatric Perioperative-Transfusion-Trigger Score is a dynamic score, which is assessed at the time specified in the CRF table and whenever the decision of allogeneic red-cell transfusion is needed.

(2) It is a real-time score which should be assessed when the blood volume is basically normal, mainly based on the clinical evaluation of attending anesthesiologist. Clinically, patients should be treated with fluid therapy without delay when blood volume is insufficient. Patients do not undergo acute high volume hemodilution therapy during the perioperative period in our study.

(3) Whether the cardiac output is normal or not is mainly evaluated by attending anesthesiologist, according to clinical indicators such as blood pressure and heart rate of children of different ages or by other assessment tools.

(4) Since the adrenaline infusion rate is a scoring factor, only continuous infusion of adrenaline should be used to increase cardiac output when it is lower than normal by clinical evaluation. For other reasons, such as transient heart rate slowdown and blood pressure reduction, acute blood loss , temporarily usage of other cardiovascular drugs (such as atropine, ephedrine, dopamine, m-hydroxylamine, norepinephrine, isoproterenol, phenylephrine, etc.) are not included in the Pediatric Perioperative-Transfusion-Trigger Scoreassessment.

(5) Method of measuring fraction of inspired oxygen (FiO2%) to maintain SpO2 ≥ 95%. The inhalation time of the oxygen is at least 10 minutes.

1. Nasal catheter oxygen inhalation, when oxygen flow is 3.5L / min, FiO2% is regarded as 35%;
2. Mask oxygen inhalation, when fresh oxygen flow is greater or equal to 6L / min, FiO2% is considered to be greater or equal to 50%;
3. Oxygen inhalation in the neonatal incubator, when fresh oxygen flow is greater or equal to 5L / min, FiO2% is considered to be greater or equal to 35%;
4. Neonatal hood oxygen inhalation,

when fresh oxygen flow is 3L / min, FiO2% is considered to be 35%;

when fresh oxygen flow is ≥5L/min, FiO2% is considered to be greater or equal to 50%;

1. Mechanical ventilation, FiO2% is determined according to ventilator parameters;
2. Mechanical ventilation by anesthesia machine (If there is no fraction of inspired oxygen monitoring parameter),

Oxygen flow 0.9L/min+ Air flow 4.1L/min—— FiO2% is 35%;

Oxygen flow 1.8L/min + Nitrous oxide flow 3.2L/min—— FiO2% is 35%;

Oxygen flow 1.8L/min+ Air flow 3.2L/min—— FiO2% is 50%;

Oxygen flow 2.5 L/min + Nitrous oxide flow 2.5 L/min—— FiO2% is 50%.

(6) Arterial blood gas analysis is recommended to determine SaO2 value ​​when SpO2 could not be obtained or accurately detected with pulse oximetry.

(7) Core body temperature can be measured by nasopharyngeal , oropharyngeal, tympanic membrane, rectal and esophageal route. Axillary temperature can be counted as core body temperature when adding 0.5 °C.

(8) The baseline score for each child is 6, which is added to the sum of above four scores as the total Pediatric Perioperative-Transfusion-Trigger Score.

(9) Maximum score. The maximum score of age group 7 ~14y is 10, that is, if the total score is above 10, 10 are counted. Age group 1 ~7y has a maximum score of 11 , age group 1month ~1y has a maximum score of 12, and the neonatal group has a maximum score of 13.

**Supplementary 2 Appendix**

Complication Rating System and Intraoperative/Postoperative Complications Record

| Patient complication rating | |
| --- | --- |
| Grade 1 (I): Immediate recovery after treatment  Grade 2 (II): Leading to extended hospital stay  Grade 3(III): Life-threatening events, basic rehabilitation within 30 days after treatment  Grade 4 (IV): Caused a significant decline in life quality 30 days after surgery  Grade 5 (V): Death within 30 days after surgery | Note: The end of the operation until 24:00 on the same day is 0 days after surgery, and the next day 00:01-24:00 is the first day after surgery. And so on. |

Definition of complications: any unexpected adverse event that occurred to a clinical study participant, whether or not the event was considered related to red blood cell transfusion.

Definition of serious complications: The Grade3/Grade4/Grade5 are defined as serious complications.

| Cardiovascular System（Multiple choices） | Time of occurrence | Patient complication rating |
| --- | --- | --- |
| □ Arrhythmia | □Intraoperative  □postoperative |__||__||__| days | □Ⅰ □Ⅱ □Ⅲ □Ⅳ □Ⅴ |
| □ Hypertension | □Intraoperative  □postoperative |__||__||__| days | □Ⅰ □Ⅱ □Ⅲ □Ⅳ □Ⅴ |
| □ Hypotension | □Intraoperative  □postoperative |__||__||__| days | □Ⅰ □Ⅱ □Ⅲ □Ⅳ □Ⅴ |
| □ Acute myocardial  infarction | □Intraoperative  □postoperative |__||__||__| days | □Ⅰ □Ⅱ □Ⅲ □Ⅳ □Ⅴ |
| □ Cardiac functional  insufficiency | □Intraoperative  □postoperative |__||__||__| days | □Ⅰ □Ⅱ □Ⅲ □Ⅳ □Ⅴ |
| □ Cardiovascular infection | □Intraoperative  □postoperative |__||__||__| days | □Ⅰ □Ⅱ □Ⅲ □Ⅳ □Ⅴ |
| □ Pericardial tamponade | □Intraoperative  □postoperative |__||__||__| days | □Ⅰ □Ⅱ □Ⅲ □Ⅳ □Ⅴ |
| □ Cardiac arrest | □Intraoperative  □postoperative |__||__||__| days | □Ⅰ □Ⅱ □Ⅲ □Ⅳ □Ⅴ |
| - Other complications , please describe below: | □Intraoperative  □postoperative |__||__||__| days | □Ⅰ □Ⅱ □Ⅲ □Ⅳ □Ⅴ |

Cardiovascular complications:

Neurological complications:

| Nervous system | Time of occurrence | Patient complication rating |
| --- | --- | --- |
| - Disorder of   consciousness | □Intraoperative  □postoperative |__||__||__| days | □Ⅰ □Ⅱ □Ⅲ □Ⅳ □Ⅴ |
| □ Disabling dyskinesia | □Intraoperative  □postoperative |__||__||__| days | □Ⅰ □Ⅱ □Ⅲ □Ⅳ □Ⅴ |
| □Intracranial hemorrhage / hematoma | □Intraoperative  □postoperative |__||__||__| days | □Ⅰ □Ⅱ □Ⅲ □Ⅳ □Ⅴ |
| □Central nervous system infection | □Intraoperative  □postoperative |__||__||__| days | □Ⅰ □Ⅱ □Ⅲ □Ⅳ □Ⅴ |
| □ Cerebral edema | □Intraoperative  □postoperative |__||__||__| days | □Ⅰ □Ⅱ □Ⅲ □Ⅳ □Ⅴ |
| □ Cerebral infarction | □Intraoperative  □postoperative |__||__||__| days | □Ⅰ □Ⅱ □Ⅲ □Ⅳ □Ⅴ |
| □ Transient ischemic attack | □Intraoperative  □postoperative |__||__||__| days | □Ⅰ □Ⅱ □Ⅲ □Ⅳ □Ⅴ |
| □Peripheral nervous system dysfunction | □Intraoperative  □postoperative |__||__||__| days | □Ⅰ □Ⅱ □Ⅲ □Ⅳ □Ⅴ |
| - Other complications , please describe below: | □Intraoperative  □postoperative |__||__||__| days | □Ⅰ □Ⅱ □Ⅲ □Ⅳ □Ⅴ |

Respiratory complications:

| Respiratory System（Multiple choices） | Time of occurrence | Patient complication rating |
| --- | --- | --- |
| □ Atelectasis | □Intraoperative  □postoperative |__||__||__| days | □Ⅰ □Ⅱ □Ⅲ □Ⅳ □Ⅴ |
| □ Respiratory insufficiency | □Intraoperative  □postoperative |__||__||__| days | □Ⅰ □Ⅱ □Ⅲ □Ⅳ □Ⅴ |
| □ Pulmonary infection | □Intraoperative  □postoperative |__||__||__| days | □Ⅰ □Ⅱ □Ⅲ □Ⅳ □Ⅴ |
| □ Asthma | □Intraoperative  □postoperative |__||__||__| days | □Ⅰ □Ⅱ □Ⅲ □Ⅳ □Ⅴ |
| □ Bronchopleural fistula | □Intraoperative  □postoperative |__||__||__| days | □Ⅰ □Ⅱ □Ⅲ □Ⅳ □Ⅴ |
| □ Pneumothorax | □Intraoperative  □postoperative |__||__||__| days | □Ⅰ □Ⅱ □Ⅲ □Ⅳ □Ⅴ |
| □ Hemothorax | □Intraoperative  □postoperative |__||__||__| days | □Ⅰ □Ⅱ □Ⅲ □Ⅳ □Ⅴ |
| □ Hemopneumothorax | □Intraoperative  □postoperative |__||__||__| days | □Ⅰ □Ⅱ □Ⅲ □Ⅳ □Ⅴ |
| □ Pyothorax | □Intraoperative  □postoperative |__||__||__| days | □Ⅰ □Ⅱ □Ⅲ □Ⅳ □Ⅴ |
| □ Respiratory failure | □Intraoperative  □postoperative |__||__||__| days | □Ⅰ □Ⅱ □Ⅲ □Ⅳ □Ⅴ |
| □ Pulmonary embolism | □Intraoperative  □postoperative |__||__||__| days | □Ⅰ □Ⅱ □Ⅲ □Ⅳ □Ⅴ |
| □ Acute respiratory distress syndrome | □Intraoperative  □postoperative |__||__||__| days | □Ⅰ □Ⅱ □Ⅲ □Ⅳ □Ⅴ |
| - Other complications , please describe below: | □Intraoperative  □postoperative |__||__||__| days | □Ⅰ □Ⅱ □Ⅲ □Ⅳ □Ⅴ |

Digestive system Complications:

| Digestive System（Multiple choices） | Time of occurrence | Patient complication rating |
| --- | --- | --- |
| □ Nausea and vomiting | □Intraoperative  □postoperative |__||__||__| days | □Ⅰ □Ⅱ □Ⅲ □Ⅳ □Ⅴ |
| □ Diarrhea | □Intraoperative  □postoperative |__||__||__| days | □Ⅰ □Ⅱ □Ⅲ □Ⅳ □Ⅴ |
| □ Anastomotic fistula | □Intraoperative  □postoperative |__||__||__| days | □Ⅰ □Ⅱ □Ⅲ □Ⅳ □Ⅴ |
| □ Abdominal abscess | □Intraoperative  □postoperative |__||__||__| days | □Ⅰ □Ⅱ □Ⅲ □Ⅳ □Ⅴ |
| □ Abdominal infection | □Intraoperative  □postoperative |__||__||__| days | □Ⅰ □Ⅱ □Ⅲ □Ⅳ □Ⅴ |
| □ Hemorrhage of digestive tract | □Intraoperative  □postoperative |__||__||__| days | □Ⅰ □Ⅱ □Ⅲ □Ⅳ □Ⅴ |
| □ Intestinal obstruction | □Intraoperative  □postoperative |__||__||__| days | □Ⅰ □Ⅱ □Ⅲ □Ⅳ □Ⅴ |
| □ Digestive tract perforation | □Intraoperative  □postoperative |__||__||__| days | □Ⅰ □Ⅱ □Ⅲ □Ⅳ □Ⅴ |
| □ Intestinal necrosis | □Intraoperative  □postoperative |__||__||__| days | □Ⅰ □Ⅱ □Ⅲ □Ⅳ □Ⅴ |
| □ Hepatic insufficiency | □Intraoperative  □postoperative |__||__||__| days | □Ⅰ □Ⅱ □Ⅲ □Ⅳ □Ⅴ |
| □ Peritonitis | □Intraoperative  □postoperative |__||__||__| days | □Ⅰ □Ⅱ □Ⅲ □Ⅳ □Ⅴ |
| - Other complications （describe below）: | □Intraoperative  □postoperative |__||__||__| days | □Ⅰ □Ⅱ □Ⅲ □Ⅳ □Ⅴ |

Renal / reproductive system complications:

| Renal / reproductive System（Multiple choices） | Time of occurrence | Patient complication rating |
| --- | --- | --- |
| □ Polyuria | □Intraoperative  □postoperative |__||__||__| days | □Ⅰ □Ⅱ □Ⅲ □Ⅳ □Ⅴ |
| □ Oliguria | □Intraoperative  □postoperative |__||__||__| days | □Ⅰ □Ⅱ □Ⅲ □Ⅳ □Ⅴ |
| □ Urinary tract infection | □Intraoperative  □postoperative |__||__||__| days | □Ⅰ □Ⅱ □Ⅲ □Ⅳ □Ⅴ |
| □Reproductive system infection | □Intraoperative  □postoperative |__||__||__| days | □Ⅰ □Ⅱ □Ⅲ □Ⅳ □Ⅴ |
| □ Urinary retention | □Intraoperative  □postoperative |__||__||__| days | □Ⅰ □Ⅱ □Ⅲ □Ⅳ □Ⅴ |
| □Urinary system obstruction | □Intraoperative  □postoperative |__||__||__| days | □Ⅰ □Ⅱ □Ⅲ □Ⅳ □Ⅴ |
| □Urinary system perforation | □Intraoperative  □postoperative |__||__||__| days | □Ⅰ □Ⅱ □Ⅲ □Ⅳ □Ⅴ |
| □ Renal insufficiency | □Intraoperative  □postoperative |__||__||__| days | □Ⅰ □Ⅱ □Ⅲ □Ⅳ □Ⅴ |
| - Other complications , please describe below: | □Intraoperative  □postoperative |__||__||__| days | □Ⅰ □Ⅱ □Ⅲ □Ⅳ □Ⅴ |

Hematological complications:

| Hematological system（Multiple choices） | Time of occurrence | Patient complication rating |
| --- | --- | --- |
| □ DIC （Disseminated intravascular coagulation） | □Intraoperative  □postoperative |__||__||__| days | □Ⅰ □Ⅱ □Ⅲ □Ⅳ □Ⅴ |
| □ Active hemorrhage | □Intraoperative  □postoperative |__||__||__| days | □Ⅰ □Ⅱ □Ⅲ □Ⅳ □Ⅴ |
| □ Deep venous thrombosis | □Intraoperative  □postoperative |__||__||__| days | □Ⅰ □Ⅱ □Ⅲ □Ⅳ □Ⅴ |
| - Other complications ( describe below): | □Intraoperative  □postoperative |__||__||__| days | □Ⅰ □Ⅱ □Ⅲ □Ⅳ □Ⅴ |

Endocrine system complications:

| Endocrine system（Multiple choices） | Time of occurrence | Patient complication rating |
| --- | --- | --- |
| □ Hyperthyreosis | □Intraoperative  □postoperative |__||__||__| days | □Ⅰ □Ⅱ □Ⅲ □Ⅳ □Ⅴ |
| □ Hypothyroidism | □Intraoperative  □postoperative |__||__||__| days | □Ⅰ □Ⅱ □Ⅲ □Ⅳ □Ⅴ |
| □ Hyperglycemia | □Intraoperative  □postoperative |__||__||__| days | □Ⅰ □Ⅱ □Ⅲ □Ⅳ □Ⅴ |
| □ Electrolyte disturbance | □Intraoperative  □postoperative |__||__||__| days | □Ⅰ □Ⅱ □Ⅲ □Ⅳ □Ⅴ |
| - Other complications ( describe below): | □Intraoperative  □postoperative |__||__||__| days | □Ⅰ □Ⅱ □Ⅲ □Ⅳ □Ⅴ |

| Motor System（Multiple choices） | Time of occurrence | Patient complication rating |
| --- | --- | --- |
| □ Fall | □Intraoperative  □postoperative |__||__||__| days | □Ⅰ □Ⅱ □Ⅲ □Ⅳ □Ⅴ |
| □Impairment of muscle strength | □Intraoperative  □postoperative |__||__||__| days | □Ⅰ □Ⅱ □Ⅲ □Ⅳ □Ⅴ |
| - Other complications (describe below): | □Intraoperative  □postoperative |__||__||__| days | □Ⅰ □Ⅱ □Ⅲ □Ⅳ □Ⅴ |

Motor system complications:

Sensory system complications:

| Sensory System（Multiple choices） | Time of occurrence | Patient complication rating |
| --- | --- | --- |
| □ Hearing impairment | □Intraoperative  □postoperative |__||__||__| days | □Ⅰ □Ⅱ □Ⅲ □Ⅳ □Ⅴ |
| □ Visual impairment | □Intraoperative  □postoperative |__||__||__| days | □Ⅰ □Ⅱ □Ⅲ □Ⅳ □Ⅴ |
| - Other complications , please describe below: | □Intraoperative  □postoperative |__||__||__| days | □Ⅰ □Ⅱ □Ⅲ □Ⅳ □Ⅴ |

Other complications:

| Other complications（Multiple choices） | Time of occurrence | Patient complication rating |
| --- | --- | --- |
| □ Wound infection | □Intraoperative  □postoperative |__||__||__| days | □Ⅰ □Ⅱ □Ⅲ □Ⅳ □Ⅴ |
| □Systemic inflammatory response syndrome / sepsis | □Intraoperative  □postoperative |__||__||__| days | □Ⅰ □Ⅱ □Ⅲ □Ⅳ □Ⅴ |
| □ Shock | □Intraoperative  □postoperative |__||__||__| days | □Ⅰ □Ⅱ □Ⅲ □Ⅳ □Ⅴ |
| □ MODS | □Intraoperative  □postoperative |__||__||__| days | □Ⅰ □Ⅱ □Ⅲ □Ⅳ □Ⅴ |
| - Other complications , please describe below: | □Intraoperative  □postoperative |__||__||__| days | □Ⅰ □Ⅱ □Ⅲ □Ⅳ □Ⅴ |
| Note: (1) Complication occurs multiple times: Rating the most serious outcome as the final rating;  (2) Grade I-III : Rating complications before discharge  (3) Grade IV : Rating complications during follow-up period  (4) Grade V: Rating complications before discharge or during the follow-up period according to the time of occurrence | | |
